# Supplementary material for: Assessment of viral methylation levels for high risk HPV types by newly designed consensus primers PCR and pyrosequencing
Source: PubMed Central journal article supplement (PMC5868804; doi:10.1371/journal.pone.0194619), 2018-03-26
Supplement: pone.0194619.s001.pdf [file pone.0194619.s001.pdf]

**S1 Table. Comparison of methylation assessment using consensus and type specific primers**

**A. HPV region L1 I**

| <b>ID LAB<br/>(N=55)</b> | <b>HPV type</b> | <b>% Methylation<br/>Consensus Primers<br/>L1 I</b> | <b>% Methylation<br/>Type Specific Primers<br/>L1 I</b> |
|--------------------------|-----------------|-----------------------------------------------------|---------------------------------------------------------|
| 1                        | 16              | 23                                                  | 28                                                      |
| 2                        | 16              | 9                                                   | 12                                                      |
| 3                        | 16              | 47                                                  | 50                                                      |
| 4                        | 16              | 6                                                   | 11                                                      |
| 5                        | 16              | 5                                                   | 9                                                       |
| 6                        | 16              | 16                                                  | 18                                                      |
| 7                        | 16              | 39                                                  | 44                                                      |
| 8                        | 16              | 5                                                   | 5                                                       |
| 9                        | 16              | 20                                                  | 23                                                      |
| 10                       | 16              | 9                                                   | 13                                                      |
| 11                       | 16              | 10                                                  | 18                                                      |
| 12                       | 16              | 31                                                  | 35                                                      |
| 14                       | 16              | 6                                                   | 12                                                      |
| 15                       | 16              | 37                                                  | 43                                                      |
| 16                       | 16              | 25                                                  | 30                                                      |
| 17                       | 16              | 10                                                  | 12                                                      |
| 18                       | 16              | 12                                                  | 14                                                      |
| 19                       | 16              | 60                                                  | 60                                                      |
| 20                       | 16              | 44                                                  | 51                                                      |
| 21                       | 16              | 14                                                  | 16                                                      |
| 36                       | 31              | 6                                                   | 4                                                       |
| 37                       | 31              | 5                                                   | 2                                                       |
| 38                       | 31              | 4                                                   | 4                                                       |
| 39                       | 31              | 4                                                   | 3                                                       |
| 40                       | 31              | 4                                                   | 3                                                       |
| 42                       | 31              | 5                                                   | 3                                                       |
| 43                       | 31              | 5                                                   | 4                                                       |
| 44                       | 31              | 6                                                   | 5                                                       |
| 45                       | 31              | 8                                                   | 6                                                       |
| 46                       | 31              | 4                                                   | 2                                                       |
| 48                       | 31              | 7                                                   | 5                                                       |
| 49                       | 31              | 5                                                   | 2                                                       |
| 50                       | 31              | 7                                                   | 5                                                       |
| 51                       | 31              | 13                                                  | 10                                                      |
| 60                       | 45              | 73                                                  | 73                                                      |
| 61                       | 45              | 94                                                  | 98                                                      |
| 62                       | 45              | 18                                                  | 24                                                      |
| 64                       | 45              | 35                                                  | 40                                                      |
| 65                       | 45              | 24                                                  | 22                                                      |
| 67                       | 45              | 19                                                  | 20                                                      |
| 68                       | 45              | 14                                                  | 22                                                      |
| 69                       | 45              | 44                                                  | 45                                                      |
| 70                       | 45              | 30                                                  | 29                                                      |
| 87                       | 58              | 6                                                   | 9                                                       |
| 88                       | 58              | 17                                                  | 21                                                      |
| 89                       | 58              | 22                                                  | 22                                                      |
| 90                       | 58              | 6                                                   | 10                                                      |
| 91                       | 58              | 8                                                   | 14                                                      |
| 92                       | 58              | 2                                                   | 6                                                       |
| 93                       | 58              | 5                                                   | 8                                                       |
| 94                       | 58              | 9                                                   | 13                                                      |
| 95                       | 58              | 4                                                   | 10                                                      |
| 96                       | 58              | 1                                                   | 8                                                       |
| 97                       | 58              | 18                                                  | 25                                                      |
| 98                       | 58              | 10                                                  | 7                                                       |

**B. HPV region L1 II**

| <b>ID LAB<br/>(N=68)</b> | <b>HPV type</b> | <b>% Methylation<br/>Consensus Primers<br/>L1 II</b> | <b>% Methylation<br/>Type Specific Primers<br/>L1 II</b> |
|--------------------------|-----------------|------------------------------------------------------|----------------------------------------------------------|
| 1                        | 16              | 17                                                   | 24                                                       |
| 2                        | 16              | 5                                                    | 10                                                       |
| 3                        | 16              | 42                                                   | 49                                                       |
| 4                        | 16              | 8                                                    | 9                                                        |
| 5                        | 16              | 3                                                    | 6                                                        |
| 6                        | 16              | 8                                                    | 11                                                       |
| 8                        | 16              | 2                                                    | 6                                                        |
| 9                        | 16              | 2                                                    | 7                                                        |
| 10                       | 16              | 8                                                    | 13                                                       |
| 11                       | 16              | 14                                                   | 14                                                       |
| 12                       | 16              | 31                                                   | 34                                                       |
| 14                       | 16              | 7                                                    | 9                                                        |
| 15                       | 16              | 25                                                   | 32                                                       |
| 16                       | 16              | 22                                                   | 25                                                       |
| 17                       | 16              | 6                                                    | 10                                                       |
| 18                       | 16              | 1                                                    | 3                                                        |
| 20                       | 16              | 17                                                   | 17                                                       |
| 21                       | 16              | 4                                                    | 7                                                        |
| 22                       | 18              | 17                                                   | 13                                                       |
| 23                       | 18              | 16                                                   | 20                                                       |
| 24                       | 18              | 12                                                   | 11                                                       |
| 26                       | 18              | 2                                                    | 4                                                        |
| 27                       | 18              | 33                                                   | 38                                                       |
| 28                       | 18              | 5                                                    | 6                                                        |
| 30                       | 18              | 16                                                   | 17                                                       |
| 31                       | 18              | 10                                                   | 9                                                        |
| 32                       | 18              | 20                                                   | 24                                                       |
| 33                       | 18              | 6                                                    | 5                                                        |
| 34                       | 18              | 3                                                    | 4                                                        |
| 35                       | 18              | 11                                                   | 10                                                       |
| 52                       | 33              | 12                                                   | 13                                                       |
| 53                       | 33              | 2                                                    | 2                                                        |
| 54                       | 33              | 7                                                    | 9                                                        |
| 55                       | 33              | 100                                                  | 100                                                      |
| 56                       | 33              | 14                                                   | 21                                                       |
| 57                       | 33              | 100                                                  | 100                                                      |
| 59                       | 33              | 9                                                    | 16                                                       |
| 60                       | 45              | 54                                                   | 57                                                       |
| 61                       | 45              | 90                                                   | 88                                                       |
| 65                       | 45              | 11                                                   | 11                                                       |
| 69                       | 45              | 40                                                   | 37                                                       |
| 70                       | 45              | 33                                                   | 30                                                       |
| 71                       | 52              | 15                                                   | 16                                                       |
| 72                       | 52              | 9                                                    | 12                                                       |
| 73                       | 52              | 11                                                   | 12                                                       |
| 74                       | 52              | 10                                                   | 11                                                       |
| 76                       | 52              | 35                                                   | 38                                                       |
| 77                       | 52              | 15                                                   | 20                                                       |
| 78                       | 52              | 22                                                   | 27                                                       |
| 79                       | 52              | 50                                                   | 47                                                       |
| 80                       | 52              | 3                                                    | 4                                                        |
| 81                       | 56              | 10                                                   | 9                                                        |
| 82                       | 56              | 24                                                   | 24                                                       |
| 83                       | 56              | 4                                                    | 4                                                        |

|     |    |    |    |
|-----|----|----|----|
| 84  | 56 | 4  | 3  |
| 86  | 56 | 4  | 3  |
| 87  | 58 | 3  | 5  |
| 88  | 58 | 8  | 11 |
| 89  | 58 | 16 | 21 |
| 90  | 58 | 3  | 4  |
| 91  | 58 | 15 | 21 |
| 92  | 58 | 4  | 6  |
| 93  | 58 | 6  | 8  |
| 94  | 58 | 12 | 15 |
| 95  | 58 | 17 | 16 |
| 97  | 58 | 60 | 60 |
| 99  | 58 | 40 | 41 |
| 100 | 58 | 49 | 49 |
