# Supplementary material for: Assessment of viral methylation levels for high risk HPV types by newly designed consensus primers PCR and pyrosequencing
Source: PubMed Central journal article supplement (PMC5868804; doi:10.1371/journal.pone.0194619), 2018-03-26
Supplement: pone.0194619.s003.pdf [file pone.0194619.s003.pdf]

**S3 Table. Quantitative methylation in tested samples**

| Sample <sup>a</sup> | HPV family | HPV type | Cytopathology <sup>b</sup> | Mean % methyl L1 I <sup>c</sup> | PyroMark Q24 score <sup>d</sup> | Mean % methyl L1 II <sup>e</sup> | PyroMark Q24 score <sup>d</sup> | Mean % methyl L2 <sup>f</sup> | PyroMark Q24 score <sup>d</sup> |
|---------------------|------------|----------|----------------------------|---------------------------------|---------------------------------|----------------------------------|---------------------------------|-------------------------------|---------------------------------|
| 1                   | 16         | 16       | NILM                       | 5                               | passed                          | 10                               | Passed                          | 16                            | Check                           |
| 2                   | 16         | 16       | HSIL                       | 8                               | passed                          | 3                                | Passed                          | 5                             | Passed                          |
| 3                   | 16         | 16       | HSIL                       | 5                               | Passed                          | 7                                | Passed                          | 4                             | Passed                          |
| 4                   | 16         | 16       | HSIL                       | 47                              | Passed                          | 48                               | Passed                          | 38                            | Passed                          |
| 5                   | 16         | 16       | HSIL                       | 10                              | Passed                          | 12                               | Passed                          | 11                            | Passed                          |
| 6                   | 16         | 16       | HSIL                       | 12                              | Passed                          | 18                               | Passed                          | 11                            | Passed                          |
| 7                   | 16         | 16       | HSIL                       | 9                               | Passed                          | 6                                | Passed                          | 6                             | Passed                          |
| 8                   | 16         | 16       | HSIL                       | 19                              | Passed                          | 12                               | Passed                          | 35                            | Check                           |
| 9                   | 16         | 16       | HSIL                       | 20                              | Passed                          | 21                               | Passed                          | 6                             | Passed                          |
| 10                  | 16         | 16       | NILM                       | 22                              | Passed                          | 4                                | Passed                          | 10                            | Check                           |
| 11                  | 18         | 18       | NILM                       | 26                              | Passed                          | 9                                | Passed                          | 12                            | Passed                          |
| 12                  | 18         | 18       | LSIL                       | 34                              | Passed                          | 31                               | Check                           | 26                            | Passed                          |
| 13                  | 18         | 18       | NILM                       | 25                              | Passed                          | 26                               | Check                           | 22                            | Passed                          |
| 14                  | 18         | 18       | LSIL                       | 20                              | Passed                          | 12                               | Passed                          | 21                            | Passed                          |
| 15                  | 18         | 18       | NILM                       | 14                              | Passed                          | 5                                | Check                           | 4                             | Check                           |
| 16                  | 18         | 18       | NILM                       | 18                              | Passed                          | 16                               | Passed                          | 9                             | Check                           |
| 17                  | 18         | 18       | LSIL                       | 11                              | Passed                          | 15                               | Passed                          | 5                             | Passed                          |
| 18                  | 18         | 18       | ASCUS                      | 29                              | Passed                          | 20                               | Passed                          | 22                            | Check                           |
| 19                  | 18         | 18       | NILM                       | 20                              | Passed                          | 13                               | Passed                          | 9                             | Passed                          |
| 20                  | 18         | 18       | NILM                       | 26                              | Passed                          | 34                               | Check                           | 5                             | Passed                          |
| 21                  | 16         | 31       | NILM                       | 13                              | Passed                          | 8                                | Passed                          | 14                            | Check                           |
| 22                  | 16         | 31       | NILM                       | 5                               | Passed                          | 4                                | Passed                          | 4                             | Passed                          |
| 23                  | 16         | 31       | HSIL                       | 6                               | Passed                          | 5                                | Passed                          | 4                             | Passed                          |
| 24                  | 16         | 31       | HSIL                       | 10                              | Passed                          | 7                                | Passed                          | 14                            | Passed                          |
| 25                  | 16         | 31       | HSIL                       | 30                              | Check                           | 29                               | Passed                          | 24                            | Check                           |
| 26                  | 16         | 31       | HSIL                       | 18                              | Check                           | 7                                | Passed                          | 11                            | Passed                          |
| 27                  | 16         | 31       | HSIL                       | 19                              | Check                           | 9                                | Passed                          | 23                            | Check                           |
| 28                  | 16         | 31       | HSIL                       | 8                               | Passed                          | 6                                | Passed                          | 7                             | Passed                          |
| 29                  | 16         | 31       | HSIL                       | 14                              | Passed                          | 12                               | Passed                          | 16                            | Check                           |
| 30                  | 16         | 31       | LSIL                       | 9                               | Passed                          | 12                               | Passed                          | 10                            | Check                           |
| 31                  | 16         | 33       | NILM                       | 19                              | Passed                          | 10                               | Passed                          | 29                            | Passed                          |
| 32                  | 16         | 33       | LSIL                       | 7                               | Passed                          | 19                               | Passed                          | 11                            | Passed                          |
| 33                  | 16         | 33       | NILM                       | 10                              | Passed                          | 13                               | Passed                          | 13                            | Passed                          |
| 34                  | 16         | 33       | NILM                       | 18                              | Check                           | 2                                | Passed                          | 3                             | Passed                          |
| 35                  | 16         | 33       | NILM                       | 6                               | Passed                          | 7                                | Passed                          | 12                            | Passed                          |
| 36                  | 16         | 33       | NILM                       | 4                               | Passed                          | 2                                | Passed                          | 3                             | Passed                          |
| 37                  | 16         | 33       | HSIL                       | 12                              | Passed                          | 61                               | Passed                          | 26                            | Passed                          |
| 38                  | 16         | 33       | ASCUS                      | 5                               | Passed                          | 2                                | Passed                          | 9                             | Passed                          |
| 39                  | 16         | 33       | HSIL                       | 34                              | Passed                          | 30                               | Passed                          | 56                            | Passed                          |
| 40                  | 16         | 33       | NILM                       | 16                              | Check                           | 40                               | Passed                          | 52                            | Passed                          |
| 41                  | 16         | 35       | LSIL                       | 3                               | Check                           | 3                                | Passed                          | 1                             | Passed                          |
| 42                  | 16         | 35       | NILM                       | 11                              | Passed                          | 4                                | Passed                          | 3                             | Passed                          |
| 43                  | 16         | 35       | NILM                       | 8                               | Passed                          | 11                               | Passed                          | 7                             | Passed                          |
| 44                  | 16         | 35       | NILM                       | 9                               | Passed                          | 9                                | Check                           | 1                             | Passed                          |
| 45                  | 16         | 35       | NILM                       | 6                               | Passed                          | 13                               | Passed                          | 5                             | Passed                          |

| Sample <sup>a</sup> | HPV family | HPV type | Cytopathology <sup>b</sup> | Mean % methyl L1 I <sup>c</sup> | PyroMark Q24 score <sup>d</sup> | Mean % methyl L1 II <sup>e</sup> | PyroMark Q24 score <sup>d</sup> | Mean % methyl L2 <sup>f</sup> | PyroMark Q24 score <sup>d</sup> |
|---------------------|------------|----------|----------------------------|---------------------------------|---------------------------------|----------------------------------|---------------------------------|-------------------------------|---------------------------------|
| 46                  | 16         | 35       | NILM                       | 6                               | Check                           | 6                                | Passed                          | 1                             | Passed                          |
| 47                  | 16         | 35       | NILM                       | 5                               | Passed                          | 6                                | Passed                          | 1                             | Passed                          |
| 48                  | 16         | 35       | HSIL                       | 27                              | Passed                          | 12                               | Passed                          | 26                            | Passed                          |
| 49                  | 16         | 35       | LSIL                       | 3                               | Passed                          | 1                                | Passed                          | 1                             | Passed                          |
| 50                  | 16         | 35       | LSIL                       | 7                               | Check                           | 2                                | Passed                          | 2                             | Passed                          |
| 51                  | 18         | 39       | NILM                       | 43                              | Check                           | 10                               | Passed                          | 14                            | Passed                          |
| 52                  | 18         | 39       | LSIL                       | 11                              | Passed                          | 10                               | Passed                          | 6                             | Passed                          |
| 53                  | 18         | 39       | NILM                       | 24                              | Passed                          | 9                                | Passed                          | 10                            | Passed                          |
| 54                  | 18         | 39       | NILM                       | 12                              | Passed                          | 7                                | Passed                          | 3                             | Passed                          |
| 55                  | 18         | 39       | NILM                       | 10                              | Passed                          | 10                               | Passed                          | 8                             | Passed                          |
| 56                  | 18         | 39       | NILM                       | 30                              | Check                           | 18                               | Passed                          | 1                             | Passed                          |
| 57                  | 18         | 39       | LSIL                       | 15                              | Passed                          | 8                                | Passed                          | 18                            | Passed                          |
| 58                  | 18         | 39       | LSIL                       | 8                               | Passed                          | 7                                | Passed                          | 6                             | Passed                          |
| 59                  | 18         | 39       | NILM                       | 7                               | Passed                          | 8                                | Passed                          | 6                             | Passed                          |
| 60                  | 18         | 39       | NILM                       | 12                              | Passed                          | 11                               | Check                           | 16                            | Passed                          |
| 61                  | 18         | 45       | NILM                       | 73                              | Passed                          | 55                               | Passed                          | 18                            | Passed                          |
| 62                  | 18         | 45       | NILM                       | 43                              | Passed                          | 41                               | Passed                          | 8                             | Passed                          |
| 63                  | 18         | 45       | NILM                       | 26                              | Passed                          | 28                               | Passed                          | 9                             | Passed                          |
| 64                  | 18         | 45       | NILM                       | 52                              | Passed                          | 46                               | Passed                          | 21                            | Check                           |
| 65                  | 18         | 45       | HSIL                       | 92                              | Passed                          | 80                               | Passed                          | 86                            | Passed                          |
| 66                  | 18         | 45       | HSIL                       | 94                              | Passed                          | 89                               | Passed                          | 88                            | Passed                          |
| 67                  | 18         | 45       | NILM                       | 24                              | Passed                          | 6                                | Passed                          | 5                             | Passed                          |
| 68                  | 18         | 45       | NILM                       | 28                              | Passed                          | 22                               | Passed                          | 16                            | Passed                          |
| 69                  | 18         | 45       | NILM                       | 24                              | Passed                          | 25                               | Check                           | 15                            | Passed                          |
| 70                  | 18         | 45       | HSIL                       | 18                              | Passed                          | 11                               | Passed                          | 5                             | Passed                          |
| 71                  | 18         | 45       | NILM                       | 30                              | Passed                          | 28                               | Passed                          | 13                            | Passed                          |
| 72                  | 18         | 51       | NILM                       | 11                              | Check                           | 23                               | Passed                          | 6                             | Passed                          |
| 73                  | 18         | 51       | LSIL                       | 3                               | Passed                          | 7                                | Passed                          | 2                             | Passed                          |
| 74                  | 18         | 51       | NILM                       | 8                               | Passed                          | 28                               | Passed                          | 19                            | Passed                          |
| 75                  | 18         | 51       | LSIL                       | 5                               | Check                           | 4                                | Passed                          | 2                             | Passed                          |
| 76                  | 18         | 51       | NILM                       | 17                              | Passed                          | 28                               | Passed                          | 10                            | Passed                          |
| 77                  | 18         | 51       | LSIL                       | 5                               | Check                           | 8                                | Passed                          | 4                             | Passed                          |
| 78                  | 18         | 51       | NILM                       | 25                              | Passed                          | 78                               | Passed                          | 17                            | Check                           |
| 79                  | 18         | 51       | NILM                       | 4                               | Passed                          | 18                               | Passed                          | 4                             | Passed                          |
| 80                  | 18         | 51       | NILM                       | 5                               | Check                           | 20                               | Passed                          | 1                             | Passed                          |
| 81                  | 18         | 51       | NILM                       | 21                              | Check                           | 19                               | Passed                          | 4                             | Passed                          |
| 82                  | 18         | 51       | NILM                       | 1                               | Passed                          | 11                               | Check                           | 2                             | Passed                          |
| 83                  | 16         | 52       | NILM                       | 14                              | Passed                          | 2                                | Check                           | 16                            | Passed                          |
| 84                  | 16         | 52       | NILM                       | 18                              | Passed                          | 44                               | Passed                          | 6                             | Passed                          |
| 85                  | 16         | 52       | NILM                       | 7                               | Passed                          | 8                                | Passed                          | 1                             | Passed                          |
| 86                  | 16         | 52       | NILM                       | 10                              | Passed                          | 14                               | Passed                          | 5                             | Passed                          |
| 87                  | 16         | 52       | NILM                       | 24                              | Passed                          | 27                               | Passed                          | 6                             | Passed                          |
| 88                  | 16         | 52       | NILM                       | 24                              | Passed                          | 38                               | Passed                          | 17                            | Passed                          |
| 89                  | 16         | 52       | HSIL                       | 10                              | Passed                          | 21                               | Passed                          | 9                             | Passed                          |
| 90                  | 16         | 52       | NILM                       | 24                              | Passed                          | 43                               | Passed                          | 7                             | Passed                          |
| 91                  | 16         | 52       | NILM                       | 18                              | Passed                          | 41                               | Passed                          | 4                             | Check                           |
| 92                  | 16         | 52       | HSIL                       | 24                              | Passed                          | 39                               | Passed                          | 11                            | Passed                          |

| Sample <sup>a</sup>      | HPV family | HPV type | Cyto logy <sup>b</sup> | Mean % methyl L1 I <sup>c</sup> | PyroMark Q24 score <sup>d</sup> | Mean % methyl L1 II <sup>e</sup> | PyroMark Q24 score <sup>d</sup> | Mean % methyl L2 <sup>f</sup> | PyroMark Q24 score <sup>d</sup> |
|--------------------------|------------|----------|------------------------|---------------------------------|---------------------------------|----------------------------------|---------------------------------|-------------------------------|---------------------------------|
| 93                       | 16         | 56       | NILM                   | 14                              | Passed                          | 7                                | Passed                          | 39                            | Passed                          |
| 94                       | 16         | 56       | NILM                   | 23                              | Passed                          | 11                               | Check                           | 1                             | Passed                          |
| 95                       | 16         | 56       | ASCUS                  | 26                              | Passed                          | 14                               | Passed                          | 42                            | Passed                          |
| 96                       | 16         | 56       | LSIL                   | 4                               | Passed                          | 4                                | Passed                          | 2                             | Passed                          |
| 97                       | 16         | 56       | NILM                   | 13                              | Passed                          | 7                                | Passed                          | 8                             | Passed                          |
| 98                       | 16         | 56       | NILM                   | 11                              | Passed                          | 7                                | Passed                          | 15                            | Passed                          |
| 99                       | 16         | 56       | LSIL                   | 5                               | Passed                          | 12                               | Passed                          | 3                             | Passed                          |
| 100                      | 16         | 56       | NILM                   | 5                               | Passed                          | 48                               | Check                           | 5                             | Passed                          |
| 101                      | 16         | 56       | NILM                   | 4                               | Passed                          | 7                                | Passed                          | 3                             | Passed                          |
| 102                      | 16         | 56       | NILM                   | 18                              | Passed                          | 9                                | Passed                          | 18                            | Check                           |
| 103                      | 16         | 56       | NILM                   | 17                              | Passed                          | 19                               | Passed                          | 30                            | Passed                          |
| 104                      | 16         | 56       | NILM                   | 5                               | Passed                          | 4                                | Passed                          | 4                             | Check                           |
| 105                      | 16         | 56       | NILM                   | 13                              | Passed                          | 11                               | Passed                          | 1                             | Check                           |
| 106                      | 16         | 56       | NILM                   | 31                              | Check                           | 41                               | Passed                          | 43                            | Passed                          |
| 107                      | 16         | 58       | NILM                   | 19                              | Passed                          | 13                               | Passed                          | 32                            | Passed                          |
| 108                      | 16         | 58       | LSIL                   | 6                               | Passed                          | 3                                | Passed                          | 12                            | Passed                          |
| 109                      | 16         | 58       | NILM                   | 12                              | Passed                          | 8                                | Passed                          | 21                            | Passed                          |
| 110                      | 16         | 58       | NILM                   | 67                              | Passed                          | 65                               | Check                           | 75                            | Passed                          |
| 111                      | 16         | 58       | NILM                   | 10                              | Passed                          | 6                                | Passed                          | 16                            | Passed                          |
| 112                      | 16         | 58       | NILM                   | 7                               | Check                           | 5                                | Passed                          | 21                            | Passed                          |
| 113                      | 16         | 58       | NILM                   | 16                              | Passed                          | 14                               | Passed                          | 24                            | Passed                          |
| 114                      | 16         | 58       | NILM                   | 16                              | Passed                          | 9                                | Passed                          | 35                            | Passed                          |
| 115                      | 16         | 58       | NILM                   | 10                              | Passed                          | 5                                | Passed                          | 27                            | Passed                          |
| 116                      | 16         | 58       | NILM                   | 10                              | Passed                          | 7                                | Passed                          | 12                            | Passed                          |
| 117                      | 18         | 59       | NILM                   | 18                              | Passed                          | 11                               | Passed                          | 2                             | Passed                          |
| 118                      | 18         | 59       | NILM                   | 15                              | Passed                          | 14                               | Passed                          | 2                             | Passed                          |
| 119                      | 18         | 59       | LSIL                   | 15                              | Passed                          | 19                               | Passed                          | 2                             | Passed                          |
| 120                      | 18         | 59       | LSIL                   | 11                              | Passed                          | 11                               | Passed                          | 2                             | Passed                          |
| 121                      | 18         | 59       | NILM                   | 17                              | Passed                          | 8                                | Passed                          | 4                             | Passed                          |
| 122                      | 18         | 59       | NILM                   | 37                              | Passed                          | 31                               | Passed                          | 4                             | Passed                          |
| 123                      | 18         | 59       | NILM                   | 11                              | Passed                          | 10                               | Passed                          | 3                             | Passed                          |
| 124                      | 18         | 59       | LSIL                   | 11                              | Passed                          | 14                               | Passed                          | 2                             | Passed                          |
| 125                      | 18         | 59       | NILM                   | 17                              | Passed                          | 10                               | Passed                          | 2                             | Passed                          |
| 126                      | 18         | 59       | NILM                   | 12                              | Passed                          | 11                               | Passed                          | 1                             | Passed                          |
| HPV16 Pl. U <sup>g</sup> | 16         | 16       | -                      | 4 (1-6)                         | Passed                          | 3 (3-7)                          | Passed                          | 2 (2-3)                       | Passed                          |
| HPV18 Pl. U <sup>g</sup> | 18         | 18       | -                      | 5 (4-9)                         | Passed                          | 5 (3-9)                          | Passed                          | 3 (1-6)                       | Passed                          |
| HPV16 Pl. M <sup>g</sup> | 16         | 16       | -                      | 93 (88-95)                      | Passed                          | 95 (93-96)                       | Passed                          | 87 (85-92)                    | Passed                          |
| HPV18 Pl. M <sup>g</sup> | 18         | 18       | -                      | 84 (80-86)                      | Passed                          | 86 (80-96)                       | Passed                          | 94 (90-95)                    | Passed                          |
| SiHA <sup>g</sup>        | 16         | 16       | -                      | 92 (90-93)                      | Passed                          | 98 (97-98)                       | Passed                          | na                            | -                               |
| HeLA <sup>g</sup>        | 18         | 18       | -                      | nd                              | -                               | 48 (45-57)                       | Passed                          | nd                            | -                               |

<sup>a</sup>Samples collected in STM from women who participated at the pilot project in Turin.

<sup>b</sup>NILM, Negative for Intraepithelial Lesion or Malignancy; ASCUS Atypical Squamous Cells of Undetermined Significance; LSIL, Low-Grade Squamous Intraepithelial Lesion; HSIL, High-Grade Squamous Intraepithelial Lesion.

<sup>c</sup> Mean percentage of methylation among all the target CpGs in the L1 I region released by PyroMark Q24 software (reference HPV16 CpG 5601, 5606, 5609, 5016)

<sup>d</sup> Colour-based score for result quality: Passed,(blue); Check, (yellow); Failed (red). No red score was assigned by the automatic PyroMark Q24 software.

<sup>e</sup> Percentage of methylation released by PyroMark Q24 software for the targeted CpG in the L1 II region (reference HPV16 CpG 6457). For HPV56 and HPV 58 mean percentage of methylation between the two targeted CpGs is reported

<sup>f</sup> Percentage of methylation released by PyroMark Q24 software for the targeted CpG in the L2 region (reference HPV16 CpG 4261)

<sup>g</sup> Mean (and range) of at least ten replicates: Pl=plasmid; U= unmethylated; M=methylated; na=not applicable, for L2 only synthetic plasmids were used as controls; nd = not detectable for deletion upon virus integration [Schwartz E, et al. *Structure and transcription of human papillomavirus sequences in cervical carcinoma cells. Nature 1995;314: 111-114*]
