# Supplementary material for: Assessment of viral methylation levels for high risk HPV types by newly designed consensus primers PCR and pyrosequencing
Source: PubMed Central journal article supplement (PMC5868804; doi:10.1371/journal.pone.0194619), 2018-03-26
Supplement: pone.0194619.s004.pdf [file pone.0194619.s004.pdf]

**S1 Fig. Examples of pyrograms with the correspondent sequence to analyse for HPV type and genomic region.**

**A. L1 I region, type HPV16**

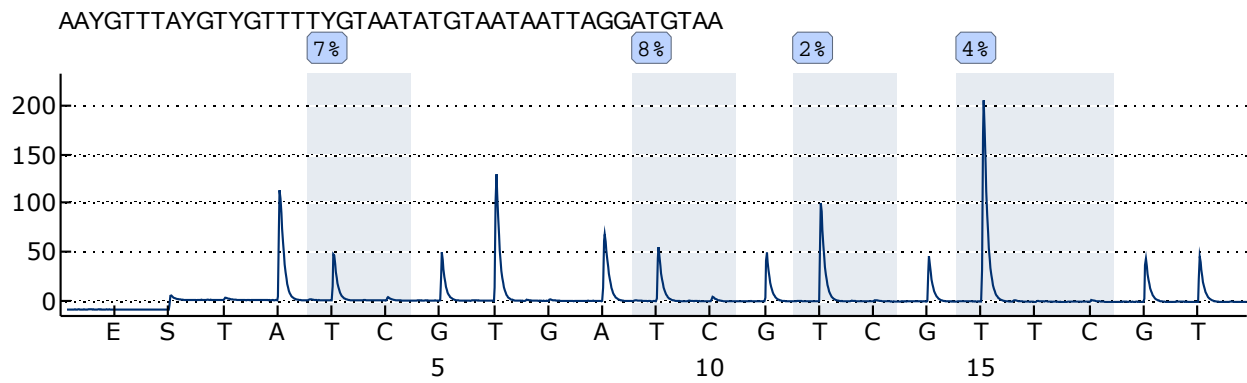

**B. L1 II region, type HPV16**

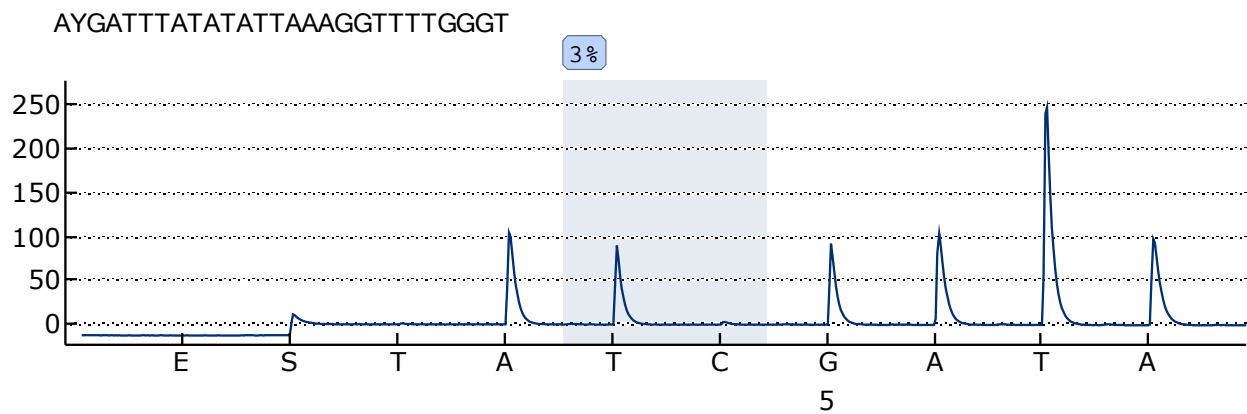

**C. L2 region, type HPV16**

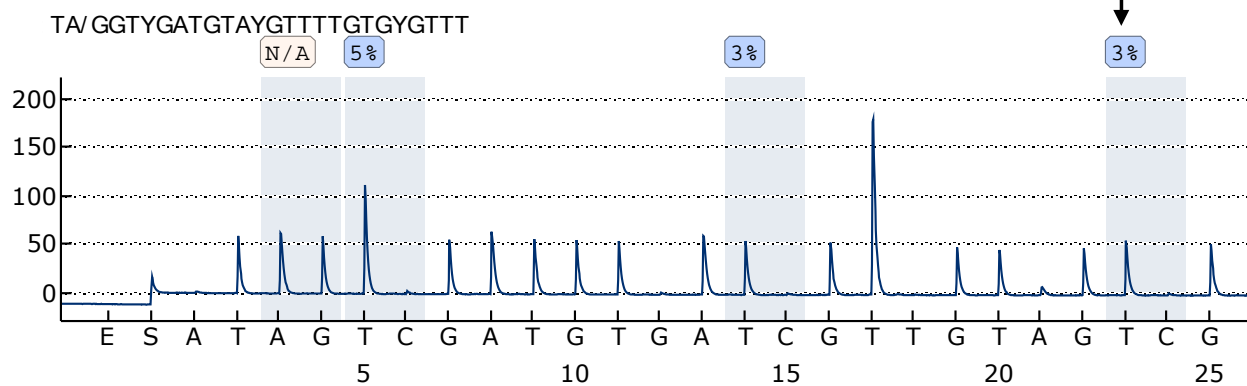

**D. L1 I region, type HPV18**

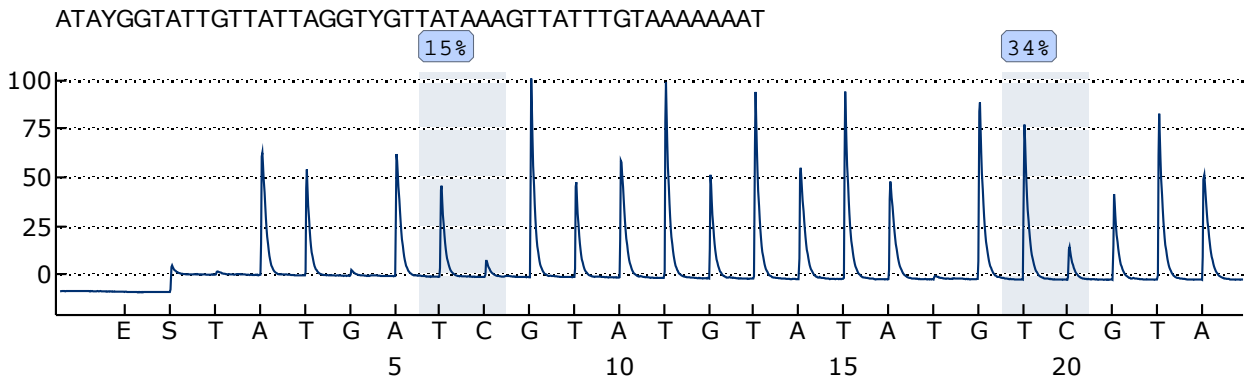

**E. L1 II region, type HPV18**

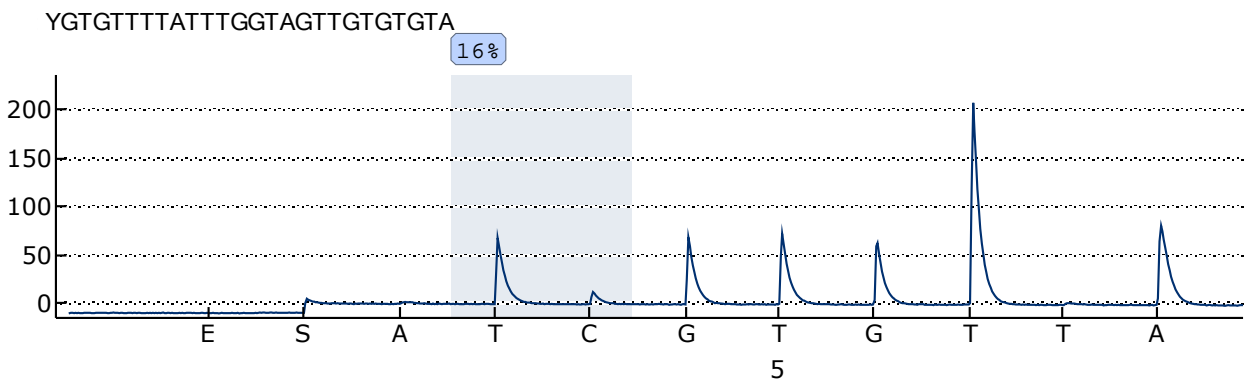

**F. L2 region, type HPV18**

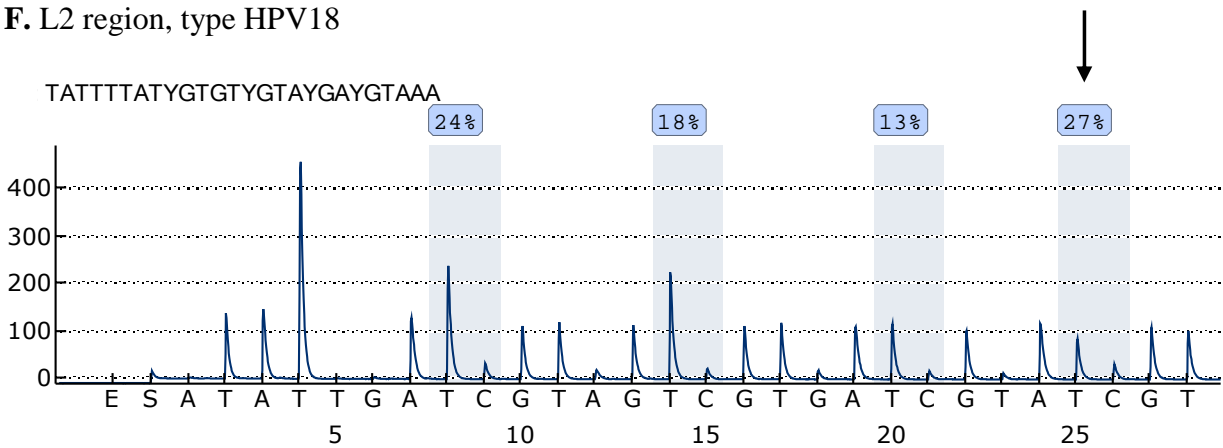

C, F: Arrows indicate the target CpG, as several CpGs are present in the sequence to analyse.
